# Supplementary material for: Tenecteplase versus alteplase for patients with acute ischemic stroke: a meta-analysis of randomized controlled trials
Source: Aging (Albany NY). 2023 Dec 26;15(24):14889–99. doi: 10.18632/aging.205315 (PMC10781500; doi:10.18632/aging.205315)
Supplement: Supplementary Tables [file aging-15-205315-s002.pdf]

## SUPPLEMENTARY TABLES

**Supplementary Table 1. Assessment of the methodological quality of included randomized trials using the cochrane collaboration's tool and the jadad scale.**

| <b>Trials</b>      | <b>Random sequence generation (selection bias)</b> | <b>Allocation concealment (selection bias)</b> | <b>Blinding of participants, personnel (performance bias)</b> | <b>Blinding of outcome assessment (detection bias)</b> | <b>Incomplete outcome data (attrition bias)</b> | <b>Selective reporting (reporting bias)</b> | <b>Other sources of bias</b> | <b>Jadad Score</b> |
|--------------------|----------------------------------------------------|------------------------------------------------|---------------------------------------------------------------|--------------------------------------------------------|-------------------------------------------------|---------------------------------------------|------------------------------|--------------------|
| TNK Phase IIB      | Low bias                                           | Low bias                                       | Low bias                                                      | Low bias                                               | Low bias                                        | Low bias                                    | Unclear                      | 5                  |
| Australian TNK     | Low bias                                           | Unclear                                        | High bias                                                     | Unclear                                                | Low bias                                        | Low bias                                    | Low bias                     | 3                  |
| ATTEST             | Low bias                                           | Low bias                                       | High bias                                                     | Unclear                                                | Low bias                                        | Low bias                                    | Low bias                     | 3                  |
| NOR-TEST           | Low bias                                           | Unclear                                        | High bias                                                     | Unclear                                                | Low bias                                        | Low bias                                    | Low bias                     | 3                  |
| EXTEND-IA TNK      | Low bias                                           | Low bias                                       | High bias                                                     | Unclear                                                | Low bias                                        | Low bias                                    | Unclear                      | 3                  |
| TRACE              | Low bias                                           | Low bias                                       | High bias                                                     | Low bias                                               | Low bias                                        | Low bias                                    | Unclear                      | 3                  |
| NOR-TEST 2, part A | Low bias                                           | Low bias                                       | High bias                                                     | Low bias                                               | Low bias                                        | Low bias                                    | Unclear                      | 3                  |
| TASTE-A            | Low bias                                           | Low bias                                       | High bias                                                     | Low bias                                               | Low bias                                        | Low bias                                    | Unclear                      | 3                  |
| AcT                | Low bias                                           | Low bias                                       | High bias                                                     | Low bias                                               | Low bias                                        | Low bias                                    | Unclear                      | 3                  |
| TRACE-2            | Low bias                                           | Low bias                                       | High bias                                                     | Low bias                                               | Low bias                                        | Low bias                                    | Unclear                      | 3                  |

**Supplementary Table 2. Summary of subgroups meta-analysis results according to geographic regions.**

| <b>Regions</b> | <b>Studies</b> | <b>Test of association</b> |                |          |
|----------------|----------------|----------------------------|----------------|----------|
|                |                | <b>OR (95% CI)</b>         | <b>P value</b> | <b>Z</b> |
| China          | 2              | 1.06 (0.97–1.15)           | 0.197          | 1.29     |
| America        | 2              | 1.29 (0.99–1.66)           | 0.193          | 1.30     |
| Europe         | 1              | 1.36 (0.66–2.79)           | 0.408          | 0.83     |
| Australia      | 3              | 1.29 (0.99–1.66)           | 0.056          | 1.91     |
